# 1 Reference-free resolution of long-read metagenomic data

2

3 Lusine Khachatryan<sup>1\*</sup>, Seyed Yahya Anvar<sup>1,2†</sup>, Rolf H. A. M. Vossen<sup>2††</sup>, and Jeroen F. J.

4 Laros<sup>1,3,4†††</sup>

5 1 - Department of Human Genetics, Leiden University Medical Center, Leiden, The Netherlands

6 2 - Leiden Genome Technology Center, Leiden University Medical Center, Leiden, The Netherlands

7 3 - Department of Clinical Genetics, Leiden University Medical Center, Leiden, The Netherlands

8 4 - GenomeScan, Leiden, The Netherlands

9

10 \* - [khachatryan.l.a@gmail.com](mailto:khachatryan.l.a@gmail.com) – Corresponding author

11 † - [s.y.anvar@lumc.nl](mailto:s.y.anvar@lumc.nl)

12 †† - [r.h.a.m.vossen@lumc.nl](mailto:r.h.a.m.vossen@lumc.nl)

13 ††† - [j.f.j.laros@lumc.nl](mailto:j.f.j.laros@lumc.nl)

14

15

16

17

18 ABSTRACT

19 *Background*

20 Read binning is a key step in proper and accurate analysis of metagenomics data. Typically, this is  
21 performed by comparing metagenomics reads to known microbial sequences. However, microbial  
22 communities usually contain mixtures of hundreds to thousands of unknown bacteria. This restricts  
23 the accuracy and completeness of alignment-based approaches. The possibility of reference-free  
24 deconvolution of environmental sequencing data could benefit the field of metagenomics,  
25 contributing to the estimation of metagenome complexity, improving the metagenome assembly, and  
26 enabling the investigation of new bacterial species that are not visible using standard laboratory or  
27 alignment-based bioinformatics techniques.

28 *Results*

29 Here, we apply an alignment-free method that leverages on  $k$ -mer frequencies to classify reads within  
30 a single long read metagenomic dataset. In addition to a series of simulated metagenomic datasets,  
31 we generated sequencing data from a bioreactor microbiome using the PacBio RSII single-molecule  
32 real-time sequencing platform. We show that distances obtained after the comparison of  $k$ -mer  
33 profiles can reveal relationships between reads within a single metagenome, leading to a clustering  
34 per species.

35 *Conclusions*

36 In this study, we demonstrated the possibility to detect substructures within a single metagenome  
37 operating only with the information derived from the sequencing reads. The obtained results are  
38 highly important as they establish a principle that might potentially expand the toolkit for the detection  
39 and investigation of previously unknown microorganisms.

40

41 KEYWORDS

42 Metagenomics binning, PacBio sequencing, metagenome resolving

43

## 44 INTRODUCTION

45 The analysis of metagenomics data is becoming a routine for many different research fields, since it  
46 serves scientific purposes as well as improves our life quality. Particularly, with the use of  
47 metagenomics a large step was made towards the understanding of the human microbiome and  
48 uncovering its real composition and diversity [1-6]. The understanding of the human microbiome in  
49 health and disease contributed to the development of diagnostics and treatment strategies based on  
50 metagenomic knowledge [7-14]. The study of microbial ecosystems allows us to predict the possible  
51 processes, changes and sustainability of particular environments [15, 16]. Genes isolated from  
52 uncultivable inhabitants of soil metagenomes are being successfully utilized, for example, in the  
53 biofuel industry for production and tolerance to byproducts [17-19]. Various newly discovered  
54 biosynthetic capacities of microbial communities benefit the production of industrial, food, and health  
55 products, as well as contribute into the field of bioremediation [20-23].

56 Despite all the progress made in resolving genetic data derived from environmental samples, it is still  
57 a challenging task. Reads binning is one of the most critical steps in the analysis of metagenomics  
58 data. To estimate the composition of a particular microbiome, it is important to ensure that sequencing  
59 reads derived from the same organism are grouped together. Currently, alignment of DNA extracted  
60 from an environmental sample to a set of known sequences remains the main strategy for  
61 metagenomics binning [24, 25]. There is a full range of techniques allowing the comparison of  
62 metagenomic reads to a reference database. It can be performed using different metagenomic data  
63 types (16S or WGS) and various matching approaches (classic alignment or use of *k*-mers or  
64 taxonomical signatures). Most of the time, the binning is performed for all reads in the database, but  
65 in some cases only a particular subset of sequencing data is selected for binning. Lastly, there is a  
66 wide spectrum of databases that can be used to perform the binning. The database might contain all  
67 possible annotated nucleotide/protein sequences, marker genes for distinct phylogenetic clades,  
68 sequencing signatures specific to particular taxa, etc. The obvious downside of all listed strategies is

69 the incapability to perform an accurate binning for the reads of organisms that are not present in the  
70 reference database.

71 Metagenomic binning was improved by alignment-free approaches, which can be split into two  
72 subgroups: reference-dependent and reference-independent methods. The tools from the first  
73 subgroup utilize existing databases to train a supervised classifier for the reads binning. Various  
74 techniques can be performed to achieve this goal: linear regression, Interpolated Markov Models,  
75 Gaussian Mixture Models, Hidden Markov Models [26-32]. Even though these approaches are  
76 reference dependent, they can be used to classify reads that are derived from previously unknown  
77 species. However, the accuracy of reference-dependent methods will be always limited by the content  
78 of reference databases. The content of the current reference databases utilized for training differs from  
79 the true distribution of microbial species on our planet [33-39]. For some metagenomic datasets the  
80 amount of unknown sequences might be quite high [40, 41], thus using supervised classification tools  
81 based on known genetic sequences is questionable in such cases.

82 Reference-independent approaches for metagenomics binning try to solve the problem of missing  
83 taxonomic content: they are designed to classify reads into genetically homogeneous groups without  
84 utilizing any information from known genomes. Instead, they use only the features of the sequencing  
85 data (usually  $k$ -mer distributions, DNA segments of length  $k$ ) for classification. One of those tools,  
86 LicklyBin, performs a Markov Chain Monte Carlo approach based on the assumption that the  $k$ -mer  
87 frequency distribution is homogeneous within a bacterial genome [42]. This tool performs well for  
88 very simple metagenomes with significant phylogenetic diversity within the metagenome, but it  
89 cannot handle genomes with more complicated structure such as those resulting from horizontal gene  
90 transfer [43]. Another one, AbundanceBin [44], works under the assumption that the abundances of  
91 species in metagenome reads are following a Poisson distribution, and thus struggles analyzing  
92 datasets where some species have similar abundance ratios. MetaCluster [45] and BiMeta [46] address  
93 this problem of non-Poisson species distribution. However, for these tools it is necessary to provide

94 an estimation of the final number of clusters, which cannot be done for many metagenomes without  
95 any prior knowledge. Also, both MetaCluster and BiMeta are using a Euclidian metric to compute the  
96 dissimilarity between  $k$ -mer profiles, which was shown to be influenced by stochastic noise in  
97 analyzed sequences [47]. Another recent tool, MetaProb, implements a more advanced similarity  
98 measure technique and can automatically estimate the number of read clusters [48]. This tool classifies  
99 metagenomic datasets in two steps: first, reads are grouped based on the extent of their overlap. After  
100 that, a set of representing reads is chosen for each group. Based on the comparison of the  $k$ -mer  
101 distributions for those sets, groups are merged together into final clusters. Even though MetaProb  
102 outperformed other tools during the analysis of simulated data, it was shown to perform not very well  
103 on the real metagenomics data.

104 In this article we present a new technique for alignment- and reference-free classification of  
105 metagenomics data. Our approach is based on a pairwise comparison of  $k$ -mer profiles calculated for  
106 each sequencing read in a long-read metagenomics dataset, using the previously described kPAL  
107 toolkit [49]. It also performs unsupervised clustering to facilitate the identification of genetically  
108 homogeneous groups of reads present in a sample. The main assumption of our method is that after  
109 assigning the pairwise distances for all reads in the dataset, those belonging to the same organism will  
110 form dense groups, and thus the metagenome binning could be resolved using density-based  
111 clustering. We developed an algorithm which automatically detects the regions with high density and  
112 hierarchically splits the dataset until there is one dense region per cluster. The approach is designed  
113 to work with long reads (more than 1000 bp) since we calculate  $k$ -mer profiles for each read separately  
114 and shorter reads would yield non-informative profiles. We performed our analysis on long PacBio  
115 reads that were either simulated or generated from a real metagenomic sample. We have shown that  
116 despite the fact that PacBio data is known to have a high error rate, the approach successfully  
117 performed read classification for simulated and real metagenomic data.

## 118 MATERIALS AND METHODS

### 119 *1. Software*

120 All analyses were done using publicly available tools (parameters used are listed below for each  
121 specific case) along with custom Python scripts.

### 122 *2. PacBio data simulation*

123 Complete genomes of five common skin bacteria were used to generate artificial PacBio  
124 metagenomes (Table 1). The reads were simulated from reference sequences using the PBSIM toolkit  
125 [50] with CLR as the output data type and a final sequencing depth of 20. For the calibration of the  
126 read length distribution, a set of previously sequenced *C. difficile* reads [51] was used as a model.

### 127 *3. Bioreactor metagenome PacBio sequencing*

128 Bioreactor metagenome coupling anaerobic ammonium oxidation (Annamox) to Nitrite/Nitrate  
129 dependent Anaerobic Methane Oxidation (N-DAMO) processes [52] was used to generate WGS  
130 PacBio sequencing data.

131 Metagenome contained the N-DAMO bacteria *Methylomirabilis oxyfera* (complete genome with  
132 GeneBank Accession FP565575.1 was used as a reference), two Annamox bacteria (*Kuenenia*  
133 *stuttgartiensis*, assembly contigs from the Bio Project PR- JEB22746 were used as a reference and a  
134 member of *Broccardia* genus, assembly contigs of *Broccardia sinica* from Bio Project PRJDB103  
135 were used as reference) and an archaea species *Methanoperedens nitroreducens* (assembly contigs  
136 from the Bio Project PRJNA242803 were used as a reference).

137 Bacterial cell pellets were disrupted with a Dounce homogenizer. DNA was isolated using a Genomic  
138 Tip 500/G kit (Qiagen) and needle sheared with a 26G blunt end needle (SAI Infusion). Pulsed-field  
139 Gel electrophoresis was performed to assess the size distribution of the sheared DNA. A SMRTbell  
140 library was constructed using 5 $\mu$ g of DNA following the 20kb template preparation protocol (Pacific  
141 Biosciences). The SMRTbell library was size selected using the BluePippin system (SAGE Science)

142 with a 10kb lower cut-off setting. The final library was sequenced with the P6-C4 chemistry with a  
143 movie time of 360 minutes.

#### 144 *4. Reads origin checking*

145 Reads were corrected using the PacBio Hierarchical Genome Assembly Process algorithm before  
146 being mapped to the genomes of the references of expected metagenome inhabitants using the BLASR  
147 aligner [53] with default settings. The alignments were used to determine the origin of the reads.  
148 Reads that were not mapped during the previous step were subjected to the BLASTn [54] search  
149 against the NCBI database. The identity cut-off was set to 90, the (E)value was chosen to be 0.001.

#### 150 *5. Bioreactor metagenome PacBio reads assembly*

151 The assembly of corrected PacBio reads was performed using the FALCON [55] assembler. The  
152 resulting contigs were mapped to the candidate reference genomes using LAST [56] with default  
153 settings. To determine the similarity cutoff for the mapping procedure, the curve representing the  
154 number of contigs versus the similarity to the reference genome was analyzed. The first inflection  
155 point at (in case of mapping contigs to the *M.oxyfera* genome 12%), dividing the fast-declining part  
156 of the curve from the slow-declining part, was chosen as a threshold (See Section S1 of Additional  
157 file 1 for more details).

#### 158 *6. Binning procedure*

159 For each read, the frequencies of all possible five-mers are calculated using the *count* command of  
160 the kPAL toolkit. The resulting profiles are balanced (a procedure that compensates for differences  
161 that occur because of reading either the forward or reverse complement strand) and compared in a  
162 pairwise manner by using the *balance* and *matrix* commands of kPAL accordingly, yielding a pairwise  
163 distance matrix. Normalization for differences in read length is dealt with by the scaling option during  
164 the pairwise comparison.

165 The resulting distance matrix, hereafter called the original distance matrix, was subjected to a multi-  
166 step clustering procedure. A schematic representation of this procedure can be found in Fig. 1. Due

167 to practical limitations (runtime), this analysis was restricted to a set of 10 000 randomly selected  
168 reads.

169

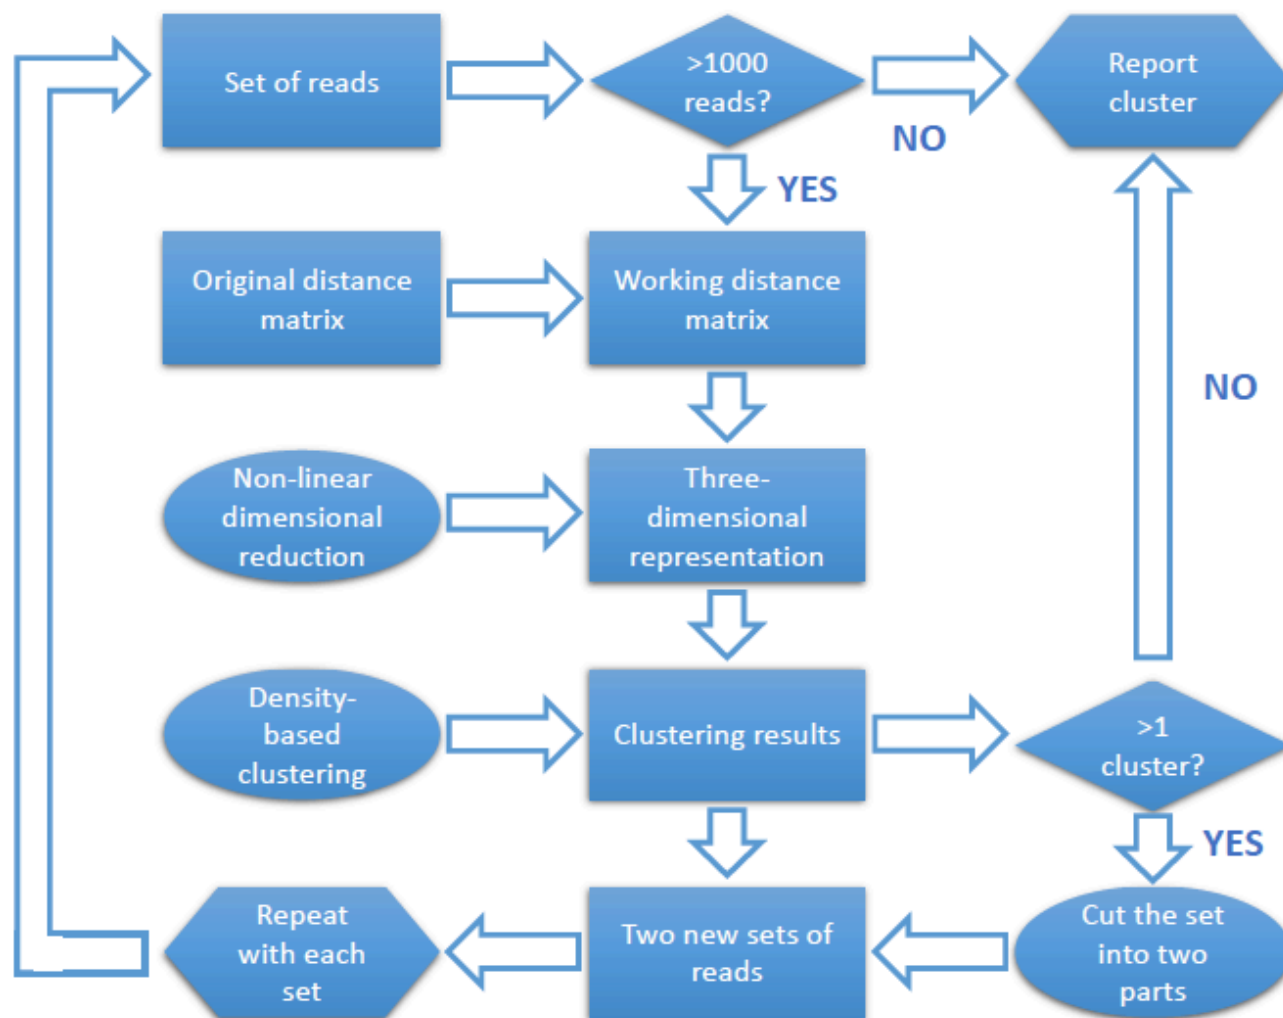

170

171 Fig. 1. Schematic representation of the clustering procedure.

172

173 This multi-step clustering procedure works recursively: it starts with the analysis of a set of reads and  
174 either reports the entire set as one cluster, or it splits the set into two subsets, which are each analyzed  
175 using the same procedure. The decision whether to split the set of reads into two subsets is made using  
176 the following approach. First, the pairwise distances for all reads in the set are extracted from the  
177 original distance matrix in order to construct the working distance matrix. After that, the



178 dimensionality of the analyzed set is decreased to three using the t-SNE algorithm [57] in order to  
179 reduce noise caused by outliers in the distance matrix. The reads, now represented by a point in three-  
180 dimensional space, are subjected to density-based clustering using the DBSCAN algorithm [58] with  
181 the default distance function. We choose the *MinPts* parameter of DBSCAN (the minimal amounts of  
182 points in the neighborhood to extend the cluster) to be either 1% of the size of the dataset for sets  
183 larger than 2000 reads, or 20 for sets smaller than 2000 reads. The number of clusters found by  
184 DBSCAN depends on the neighborhood diameter  $\epsilon$ . When  $\epsilon$  is too small, no clusters are reported  
185 since all points are isolated. On the other hand, when  $\epsilon$  is too large all points are grouped into one  
186 cluster. Our algorithm therefore performs a parameter sweep for  $\epsilon$ , from the value providing zero  
187 clusters to the value with which 99% of the reads are grouped in one cluster for the chosen *MinPts*.  
188

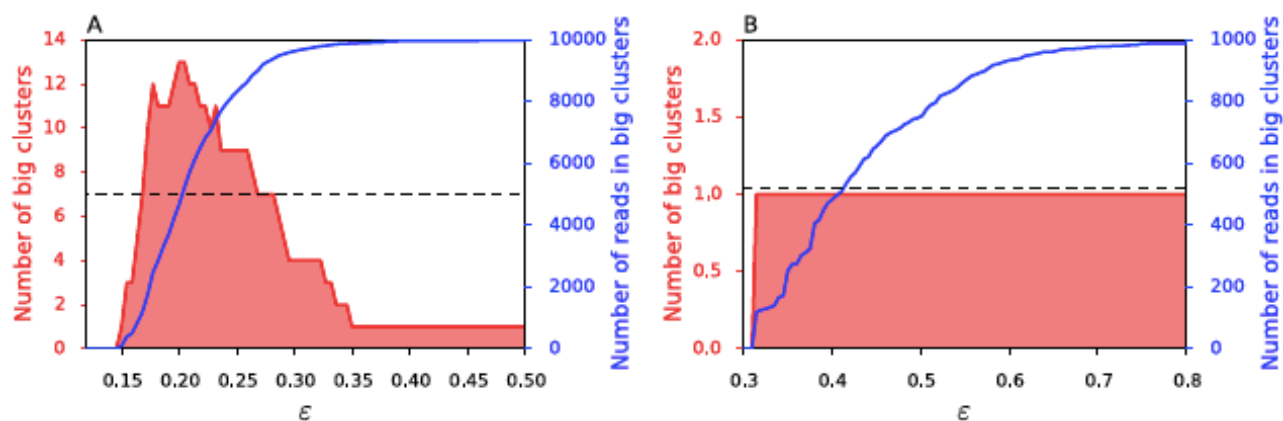

189  
190 Fig. 2. Density-based clustering analysis example. The data is clustered with DBSCAN with  $\epsilon$  ranging from 0 to the value  
191 when 90% of the points are assigned to one cluster. When at least half of the data set is assigned to a dense cluster, the  
192 number of clusters is used to determine whether subdivision of the data set is required. Only if more than one cluster is  
193 identified at this point, the procedure is repeated recursively with two partitions of the data. The partitions are determined  
194 by using the largest  $\epsilon$  that clusters the data into two clusters. In this example two datasets are shown: one that was further  
195 split into two partitions (A) and one that was reported as one dense cluster (B).  
196

197 The results of this parameter sweep are used to check the dependency of the number of dense clusters  
198 on a particular  $\epsilon$  (only clusters larger than 100 points are considered) and how many points of the

199 analyzed set are included in the obtained clusters (Fig. 2). If for some  $\epsilon$  there are two or more clusters  
200 that together cover more than half of the total amount, the analyzed set is divided into two new sets  
201 (Fig. 2A). The analyzed set is reported as one cluster if the aforementioned condition is not satisfied  
202 (Fig. 2B), or when the size of the analyzed set was smaller than 1000 points.

203 The division is done using the following strategy. DBSCAN is performed using the optimal  $\epsilon$ ,  
204 yielding two dense clusters that serve as center points for two partitions. Each of the remaining  
205 unclassified points is assigned to the cluster containing the closest classified neighbor.

#### 206 *7. Classification for larger sets*

207 Read classification for sets larger than 10 000 was performed in two steps. First, 10 000 reads (larger  
208 than 10kb) were randomly chosen and classified using the algorithm described in previous section.  
209 After that, the pairwise distances between every unclassified read and every classified read were  
210 calculated using their 5-mer profiles. These distances were used to assign the unclassified read to the  
211 cluster containing the closest classified read.

#### 212 *8. Data availability*

213 Sequencing reads of bioreactor metagenome were submitted to NCBI under the BioProject number  
214 PRJNA487927. Artificial PacBio metagenomic reads with the addition of 0%, 5%, 10%, and 15% of  
215 real “noise” reads were submitted to NCBI under the BioProject number PRJNA533970.  
216 Supplementary materials were deposited on Figshare and available for downloading using the  
217 following link: <https://doi.org/10.6084/m9.figshare.c.4218857.v1>.

218 Example of the classification procedure can be found using the following link:

219 [https://git.lumc.nl/l.khachatryan/pacbio-meta/blob/master/analysis/real\\_data/tsne\\_subset2/analysis\\_example.ipynb](https://git.lumc.nl/l.khachatryan/pacbio-meta/blob/master/analysis/real_data/tsne_subset2/analysis_example.ipynb)

220

## 221 RESULTS

### 222 1. Reads classification in artificial PacBio metagenomes

223 To construct artificial metagenomes, we used simulated PacBio reads based on the genomes of five  
224 common skin flora bacteria together with so-called "noise" reads. These are reads from a PacBio  
225 sequencing data of an environmental metagenome [59] that were not assigned to the major inhabitant  
226 *K. stuttgartiensis* or other known organisms. They were added to represent low abundant species that  
227 are present in any typical metagenomic dataset.

228 We constructed four artificial PacBio datasets in this way, each containing 10 000 randomly selected  
229 reads (length > 9kb) containing 0%, 5%, 10% and 15% noise reads, respectively. For the simplicity  
230 the number of simulated reads was adjusted to provide an equal abundance for each bacterium in the  
231 final metagenome (see Table 1).

232 We subjected each dataset to the classification procedure described in Section 6 of MATERIALS  
233 AND METHODS. The reads in the resulting clusters were then classified according to their origin  
234 (See Section S2 of Additional file 1 for more data).

235

236 **Table 1.** Content of artificial metagenomics PacBio datasets.

| Reads origin            | RefSeq AC   | Genome length, Mb | Number of reads per dataset |          |           |           |
|-------------------------|-------------|-------------------|-----------------------------|----------|-----------|-----------|
|                         |             |                   | 0% noise                    | 5% noise | 10% noise | 15% noise |
| <i>S. mitis</i>         | NC_013853.1 | 2.1               | 1 246                       | 1 183    | 1 121     | 1 059     |
| <i>P. acnes</i>         | NC_017550.1 | 2.5               | 1 443                       | 1 371    | 1 298     | 1 226     |
| <i>S. epidermidis</i>   | NC_004461.1 | 2.6               | 1 448                       | 1 376    | 1 304     | 1 231     |
| <i>A. calcoaceticus</i> | NC_016603.1 | 3.9               | 2 236                       | 2 125    | 2 013     | 1 901     |
| <i>P. aeruginosa</i>    | NC_002516.2 | 6.3               | 3 627                       | 3 446    | 3 264     | 3 083     |

237

238 In Fig. 3, it can be seen that for each experiment we obtained five large clusters (> 1 000 reads)  
239 consisting mainly of reads belonging to the same species.

240

 *S. mitis* *P. acnes* *S. epidermidis* *A. calcoaceticus* *P. aeruginosa* noise

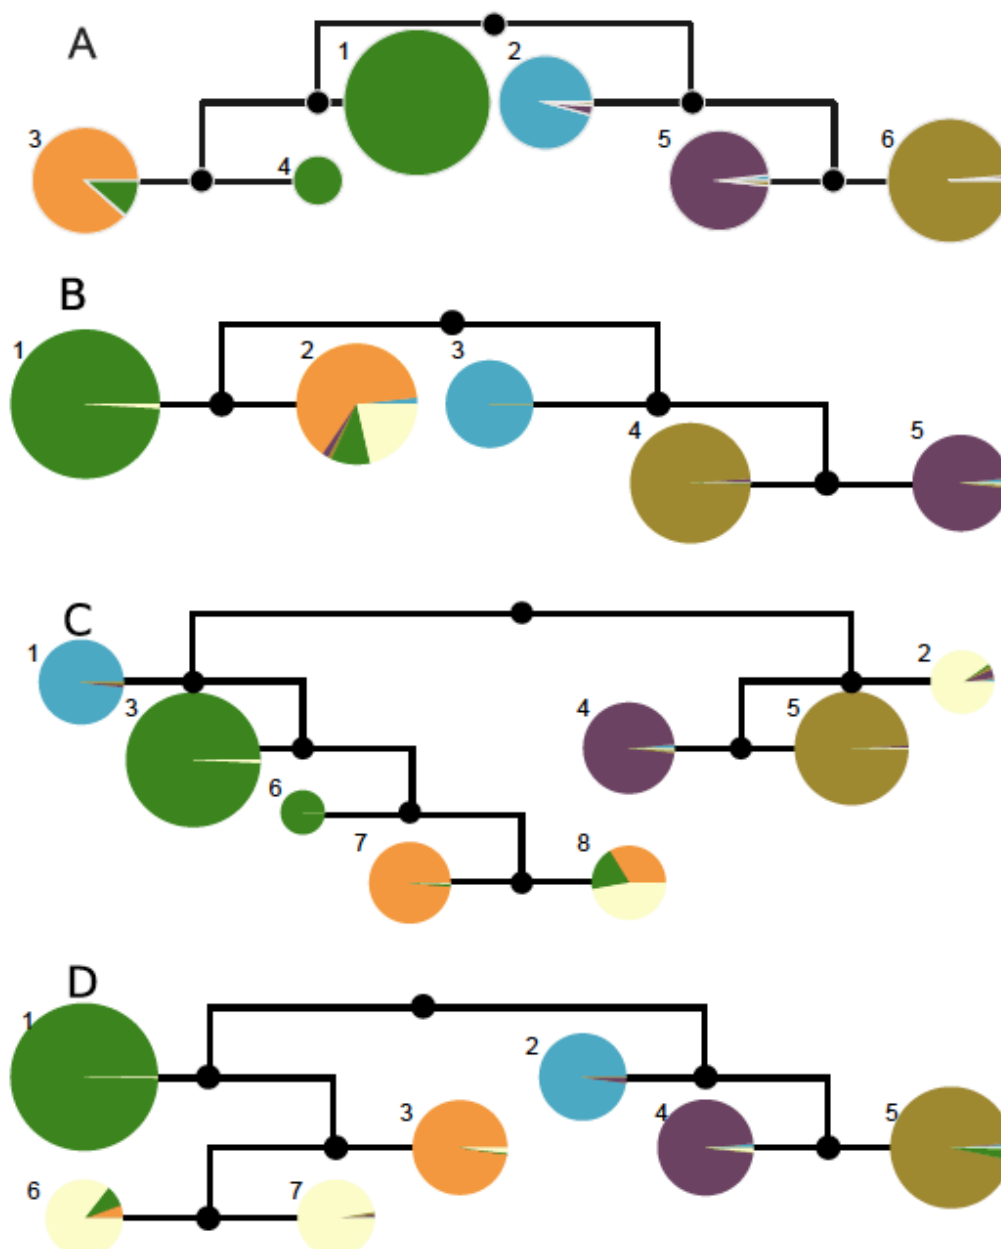

241  
242 Fig. 3. Classification recall for artificial PacBio metagenomes. Subsets that were subjected to the partitioning are shown  
243 as black circles, final clusters are represented as pie charts with the color indicating the reads origin. The area of the pie  
244 chart corresponds to the relative cluster size. The cluster number is shown next to each pie chart. The results are shown  
245 for datasets with 0% (A), 5% (B), 10% (C) and 15% (D) of noise reads.

246 For all three datasets containing noise reads we see the tendency of noise reads to be clustered with  
 247 some fraction of *P. acnes* and *P. aeruginosa* reads.

248 However, as can be seen from Fig. 3 and Table 2, increasing the noise content leads to better isolation  
 249 of these reads. Indeed, for dataset B (5% of the noise reads), the majority of noise reads were assigned  
 250 to the cluster that is primarily occupied by reads belonging to *P. acnes* and *P. aeruginosa*. Increasing  
 251 the noise content (dataset C and D in Fig. 4, 10% and 15% noise reads accordingly) led to the  
 252 appearance of two clusters which contain mostly noise reads (Table 2, A).

253  
 254 **Table 2.** Composition of clusters containing the majority of noise reads after the classification procedure for three artificial  
 255 PacBio datasets.

| <b>Dataset</b>       | <b>5% noise</b>  | <b>10% noise</b> |                  | <b>15% noise</b> |                  |
|----------------------|------------------|------------------|------------------|------------------|------------------|
| <b>Reads origin</b>  | <b>Cluster 2</b> | <b>Cluster 2</b> | <b>Cluster 8</b> | <b>Cluster 6</b> | <b>Cluster 7</b> |
| <b>A</b>             |                  |                  |                  |                  |                  |
| noise                | 21.4             | 90.3             | 47.8             | 85.6             | 97.3             |
| <i>P. acnes</i>      | 63.7             | 0.5              | 33.8             | 5.6              | 0                |
| <i>P. aeruginosa</i> | 10.4             | 1.3              | 19.1             | 8.9              | 0                |
| <b>B</b>             |                  |                  |                  |                  |                  |
| noise                | 91.8             | 55.9             | 39.9             | 45.0             | 50.8             |
| <i>P. acnes</i>      | 99.6             | 0.2              | 22.3             | 3.6              | 0                |
| <i>P. aeruginosa</i> | 6.4              | 0.2              | 5.3              | 2.3              | 0                |

256 A - cluster composition; B - the percentage of reads with particular origin (noise, *P. acnes* or *P. aeruginosa*) included to  
 257 the cluster within all reads of the same origin in the dataset. Clusters are grouped per dataset. Only organisms whose reads  
 258 would occupy more than 90% of cluster content are shown.

259

260 We also see that with the *increase* of noise content, the fractions of *P. acnes* and *P. aeruginosa* reads  
261 included in the same clusters as the noise reads are dropping (Table 2, B). In conclusion, the more  
262 noise reads were added to the dataset, the more they were grouped together in one or two clusters  
263 (Table 2, A).

#### 264 4.2 PacBio sequencing of bio reactor metagenome

265 After sequencing and correction, we obtained 31,757 reads longer than 1kb for the bio reactor  
266 metagenome. The read length distribution for this dataset can be found in Fig. 4.

267

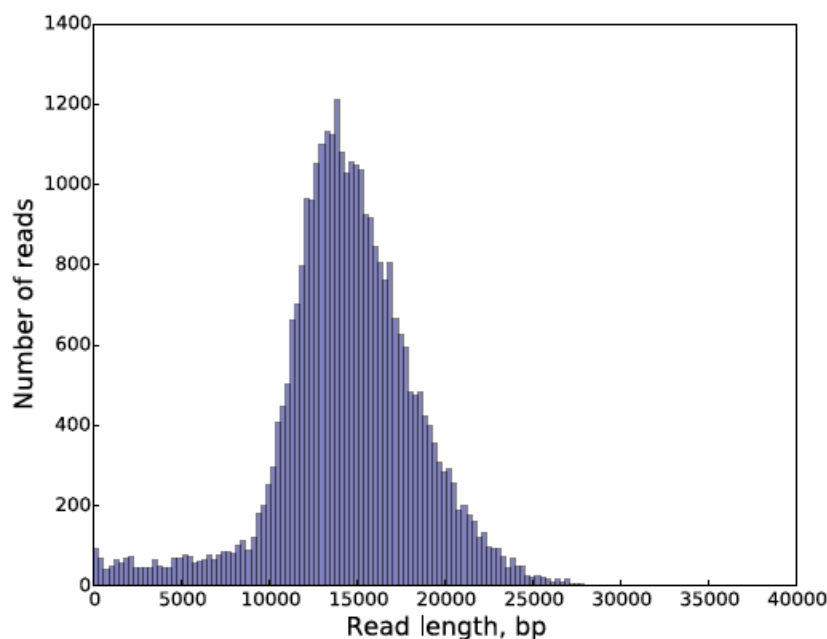

268  
269 Fig. 4. Bio reactor metagenome reads length distribution.

270  
271 Reads were mapped to the genomes of the expected metagenome inhabitants or genomes of closely  
272 related species. Since the groups of reads that we could map to the genomes of *K. stuttgartiensis* and  
273 *B. sinica* had a significant overlap (27%), we decided to combine reads mapped to the reference  
274 genomes of these two organisms in one group. We detected almost no (0.01%) reads that would map  
275 to the *M. nitroreducens* genome in the sequencing data, suggesting that this organism was either not  
276 present in the metagenome sample, or that its DNA could not be isolated reliably during the sample

277 preparation. Thus, we divided our reads into three groups: uniquely mapped on *M. oxyfera* (4,903  
278 reads), uniquely mapped on *K. stuttgartiensis/B. sinica* (2973 reads), and all remaining reads with  
279 unknown origin (~75%, 23881 reads). The reads with unknown origin were checked with the  
280 BLASTn software against NCBI microbial database, to find significant similarity to any known  
281 organism. However, only 334 reads (less than 2% of total number of checked reads) got hits; there  
282 were no organisms among the obtained hits reported more than 53 times.

#### 283 *4.3 Bio reactor metagenome PacBio read classification*

284 For the reads originating from *M. oxyfera* and *K. stuttgartiensis/B. sinica*, we checked whether the  
285 data was clustered by origin. Since roughly 75% of this sequencing data is of unknown origin, we  
286 assessed whether the clustering results for reads with unknown origin is robust. To do this, we created  
287 five subsets using the bio reactor metagenome sequencing data. Each subset contains 10,000 randomly  
288 selected reads with length > 10kb. After subjecting each subset to the classification procedure, we  
289 checked whether reads, shared by two subsets, are being clustered similarly. We compared all clusters  
290 from different subsets in a pairwise manner and marked two clusters 'similar' when they shared at  
291 least 25% of their content. On average, every pair of subsets shared 34% of their content. Thus, in  
292 case of perfect matching of clustering results, the pair of clusters from two different subsets should  
293 on average share 34% of their content. The 25% cutoff value was chosen to compensate for possible  
294 flaws introduced by clustering mis-assignments. In Fig. 5 this analysis is shown as a graph: each pie  
295 chart represents a cluster obtained for one of the subsets (with a subset number marked next to the pie  
296 chart).

297

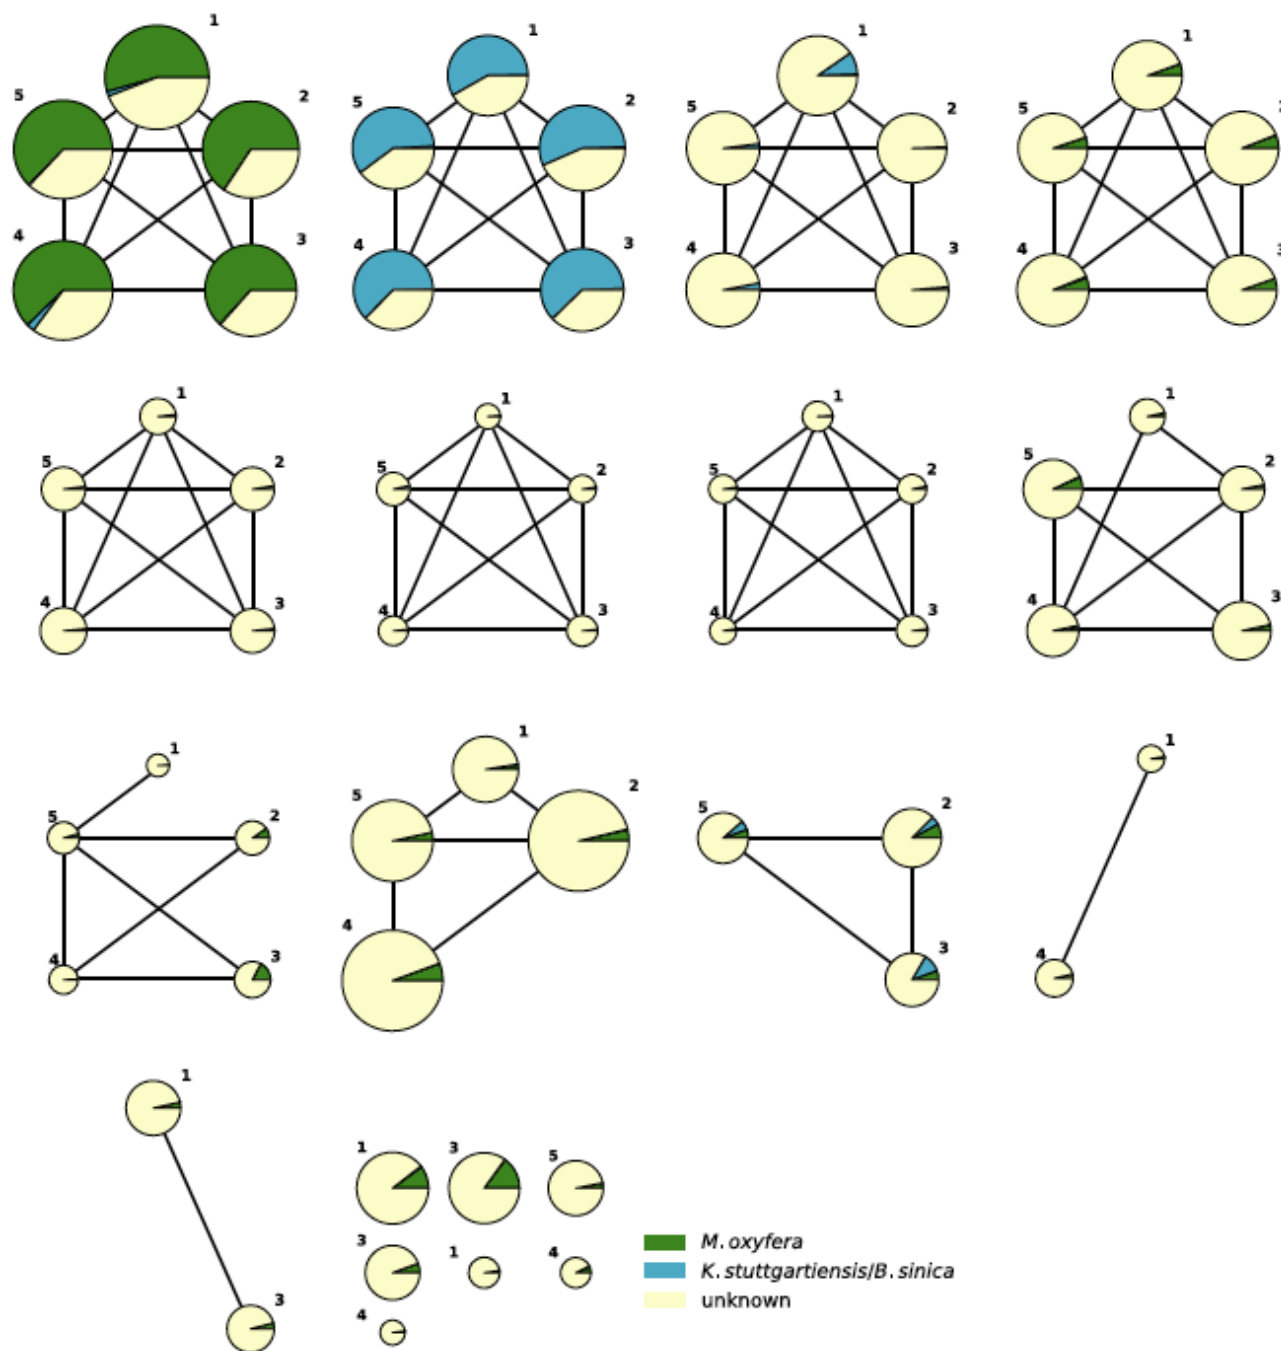

298  
 299 Fig. 5 Comparison of classification results obtained for five Bio reactor sub-datasets. The pie charts represent reported  
 300 clusters for all sub-datasets colored by the origin of reads in cluster. The pie chart area indicates the relative size of the  
 301 cluster. The number next to the node denotes the sub-dataset, for which the cluster was obtained. Two clusters are  
 302 connected with a node if they belong to two different sub-datasets and share at least 25% of their content. The groups of  
 303 size five (the set of five fully connected pie-charts) represent groups of stable clusters.  
 304



305 Clusters are connected if they were marked as similar and thus shared more than 25% of their content.  
306 We looked for sub-graphs, of size five for which all five nodes would be mutually connected. That  
307 would mean that all five clusters are coming from the different subsets and share a significant (at least  
308 25% out of 34% possible) number of reads. These groups of clusters (here and after called the stable  
309 groups) represent reads that are clustered the same way regardless of the subset of reads selected.  
310 Clusters belonging to the stable groups are called the stable clusters. The proportion of reads in the  
311 stable clusters was comparable among datasets and equaled on average 64%. As displayed in Fig. 5,  
312 we found seven groups of stable clusters. Four groups of stable clusters have clusters with more than  
313 1 000 reads, and two of those four are represented by clusters enriched with *M. oxyfera* or  
314 *K. stuttgartiensis/B. sinica* reads. In Table 3 we display the content and the number of reported  
315 clusters after the classification procedure for each of the five subsets.

316

317 Table 3. Subsets information and clustering results.

| <b>Subset</b>                                     | <b>1</b> | <b>2</b> | <b>3</b> | <b>4</b> | <b>5</b> |
|---------------------------------------------------|----------|----------|----------|----------|----------|
| number of <i>M.oxyfera</i> reads                  | 1 499    | 1 563    | 1 528    | 1 544    | 1 529    |
| number of <i>K.stuttgartiensis/B.sinica</i> reads | 949      | 918      | 981      | 935      | 906      |
| Clusters after the classification procedure       | 14       | 11       | 13       | 13       | 12       |
| Big (>1000 reads) clusters                        | 5        | 5        | 5        | 5        | 5        |
| % of reads in stable clusters                     | 65.96    | 64.12    | 61.98    | 64.46    | 64.16    |

318

319

320 Once we estimated the robustness of the classification procedure, we selected the subset that yielded  
321 the lowest number of clusters (subset 2, 11 clusters) for downstream analysis. The content of all  
322 clusters that were not reported as stable were merged into one cluster. Thus, the original 10 000 reads

323 were spread among 8 clusters. These clusters were used as a classifier for the remaining 21 757 reads  
324 in the dataset (Table 4).

325

326 **Table 4.** Results of bio reactor metagenome reads classification

| Cluster | Stable | Reads before extension | Reads after extension |
|---------|--------|------------------------|-----------------------|
| 1       | Yes    | 403                    | 1 038                 |
| 2       | Yes    | 168                    | 528                   |
| 3       | Yes    | 1 133                  | 3 204                 |
| 4       | Yes    | 1 540                  | 5 151                 |
| 5       | Yes    | 1 004                  | 3 337                 |
| 6       | Yes    | 181                    | 506                   |
| 7       | Yes    | 1 983                  | 6 459                 |
| 8       | No     | 3 588                  | 11 534                |

327

#### 328 4.5. Assembly of the bio reactor metagenome before and after reads binning

329 We assembled reads belonging to different clusters separately, and compared the resulting contigs  
330 with the results of the assembly of the entire dataset. The total number of contigs after assembly of  
331 the partitioned dataset was comparable to the amount of contigs obtained from the assembly of the  
332 entire dataset (Table 5). The same can be said about the total length of contigs and contigs length  
333 distributions (see supplementary materials). These results, showing that the database partitioning did  
334 not lead to the change of the contigs number or their lengths, can be seen as indirect evidence proving  
335 that our *k*-mer based binning of metagenome reads results in species-based clustering.

336 We compared the assembled contigs obtained for the entire and partitioned datasets to the reference  
337 genomes of *M. oxyfera*, *K. stuttgartiensis* and *B. sinica*. Even though we could successfully map  
338 around 9% of the reads to the reference genomes of *K. stuttgartiensis* and *B. sinica*, we did not get

339 contigs that could be mapped to these genomes. However, the contigs assembled from the entire and  
 340 partitioned datasets did map to *M. oxyfera* genome. Only 91 out of 196 contigs obtained from the  
 341 entire dataset assembly could be mapped back to the *M. oxyfera* genome covering 54% of its length.  
 342 For the assembly of the partitioned dataset, 85 contigs were mapped to the genome of *M. oxyfera* in  
 343 total, covering 52.65% of its length. The vast majority of those contigs (79, covering 51% of the  
 344 *M. oxyfera* genome length) derived from the assembly of reads belonging to one cluster. Thus, our  
 345 dataset partitioning binned the majority of contigs according to their origin.

346

347 **Table 5.** Results of entire and partitioned bio reactor sequencing data assembly and comparison of obtained contigs to  
 348 the *M.oxyfera* genome.

| Dataset assembled                         | Entire dataset | Cluster 1 | Cluster 2 | Cluster 3 | Cluster 4 | Cluster 5 | Cluster 6 | Cluster 7 | Cluster 8 |
|-------------------------------------------|----------------|-----------|-----------|-----------|-----------|-----------|-----------|-----------|-----------|
| Assembly length, bp                       | 3 251 357      | 5 438     | 10 747    | 380,905   | 377 792   | 601 065   | 0         | 1 602 878 | 41 310    |
| Contigs                                   | 196            | 1         | 1         | 28        | 30        | 47        | 0         | 79        | 4         |
| Contigs mapped on <i>M.oxyfera</i> genome | 91             | 0         | 0         | 9         | 1         | 2         | 0         | 71        | 2         |
| Length of mapped contigs, bp              | 1 842 182      | 0         | 0         | 132 863   | 11 945    | 21 105    | 0         | 1 497 132 | 17 013    |
| % of <i>M.oxyfera</i> genome covered      | 54             | 0         | 0         | 1.2       | 0.1       | 0.15      | 0         | 51        | 0.2       |

349

350 DISCUSSIONS

351 We described a new approach for efficient, alignment-free binning of metagenomic sequencing reads  
352 based on  $k$ -mer frequencies. Our method successfully classifies reads per organism of origin, for both  
353 simulated and real metagenomics data.

354 As shown in the results section, the approach was used to classify reads obtained by PacBio  
355 sequencing of a real bio reactor metagenome. The absolute majority of the reads with known origin  
356 (*M. oxyfera* or *K. stuttgartiensis/B. sinica*) were clustered together per origin after pairwise  
357 comparison of their  $k$ -mer profiles and subsequent density-based cluster detection. This result was  
358 robust, as we observed during the analysis of five subsets of the original PacBio sequencing data with  
359 overlapping content. The same experiment demonstrated that each subset provides a similar number  
360 of clusters. Reads with unknown origin tended to cluster similarly among different subsets, again  
361 confirming the clustering consistency. Although the majority of reads in the analyzed metagenome  
362 was of unknown origin, the results can be used to estimate the microbial community complexity for  
363 its most abundant inhabitants.

364 The binning of the bio-reactor metagenomics dataset had almost no influence on the results of the  
365 metagenome assembly. The number of contigs and their lengths obtained for the entire and partitioned  
366 datasets were comparable. This indicates that the  $k$ -mer based reads binning leads to the organism-  
367 based partitioning of metagenomic data. Furthermore, contigs, belonging to the same organism, were  
368 automatically grouped together when assembling the dataset subjected to the classification procedure.  
369 Thus, our  $k$ -mer based binning technique can be used to interpret metagenomic assembly results.

370 Performing the binning procedure on an artificially generated PacBio datasets lead to a reads  
371 classification per organism, even after adding reads with unknown origin (noise reads). Moreover,  
372 increasing the proportion of noise reads leads to a better separation between them and the reads with  
373 known origin. This observation supports the central hypothesis of this research, namely that  $k$ -mer

374 distances can be used to cluster reads of the same origin together once those reads provide sufficient  
375 coverage of the organisms' genome.

376 The main disadvantages of the current implementation of our method is the limited number of reads  
377 (10 000) that can be analyzed. As mentioned before, reads, derived from the same organism, will  
378 cluster together, but this is possible only under the condition that the organisms' genome is  
379 sufficiently covered. Thus, the described technique is unsuitable for the analysis of metagenomes with  
380 a large number of inhabitants or when the inhabitants have large genomes, as 10 000 reads will not  
381 be enough to provide sufficient coverage. The depth of the classification that can be performed by the  
382 suggested method is still to be discovered.

383 We believe that adapting our metagenomics reads binning technique for larger sets of data and further  
384 investigation of its metagenome resolving capacity would allow to expand the current limits of  
385 microbiology in the future.

## 386 CONCLUSIONS

387 In this study we demonstrated the possibility to detect substructures within a single metagenome  
388 operating only with the information derived from the sequencing reads. Results obtained for both  
389 artificial and real metagenomic data indicated the reads clustering per their known origin. We have  
390 shown the robustness of the obtained results by adding different proportions of “noise” reads to the  
391 artificially generated metagenomic data and by comparing the results of binning procedure performed  
392 on the different subsets of the same real metagenomic dataset. The obtained results are highly  
393 important as they establish a principle that might potentially greatly expand the toolkit for the  
394 detection and investigation of previously unknown microorganisms.

395 LIST OF ABBREVIATIONS

396 PacBio - Pacific Biosciences

397 NGS - next-generation sequencing;

398 N-DAMO - Nitrite/Nitrate dependent Anaerobic Methane Oxidation

399 Annamox - anaerobic ammonium oxidation

400 WGS - whole-genome shotgun sequencing.

401

402 DECLARATIONS

403 *Ethics approval and consent to participate*

404 Since in this research no human material or clinical records of patients or volunteers were used, this

405 research is out of scope for a medical ethical committee. This information was verified by the Leiden

406 University Medical Center Medical Ethical Committee.

407 *Consent for publication*

408 Not applicable

409 *Availability of data and material*

410 Sequencing reads of bioreactor metagenome were submitted to NCBI under the BioProject number

411 PRJNA487927. Artificial PacBio metagenomic reads with the addition of 0%, 5%, 10%, and 15% of

412 real “noise” reads were submitted to NCBI under the BioProject number PRJNA533970.

413 Supplementary materials (Additional file 1) were deposited on Figshare and available for

414 downloading using the following link: <https://doi.org/10.6084/m9.figshare.c.4218857.v1>.

415 Example of the classification procedure can be found using the following link:

416 [https://git.lumc.nl/l.khachatryan/pacbio-meta/blob/master/analysis/real\\_data/tsne\\_subset2/analysis\\_example.ipynb](https://git.lumc.nl/l.khachatryan/pacbio-meta/blob/master/analysis/real_data/tsne_subset2/analysis_example.ipynb)

417 *Competing interests*

418 The authors declare that they have no competing interests

419 *Funding*

420 This work is part of the research program “Forensic Science” which is funded by grant number  
421 727.011.002 of the Netherlands Organisation for Scientific Research (NWO). The funding body had  
422 no direct influence on the design of the study, collection of samples, analysis or interpretation of the  
423 data.

424 *Authors' contributions*

425 LK algorithm developing, data acquisition, analysis and interpretation, manuscript drafting; SYA  
426 conception, data acquisition and analysis, manuscript editing; RHAMV data acquisition, manuscript  
427 editing; JFJL conception, manuscript editing, general supervision.

428 *Acknowledgements*

429 Authors would like to thank the group of Prof. Huub Op den Camp for the bioreactor metagenome  
430 material, Prof. Boudewijn P. F. Lelieveldt for the idea to perform dimensional reduction using t-SNE,  
431 and Martijn Vermaat for the help with coding.



432 REFERENCES

- 433 [1] Bikel S, Valdez-Lara A, Cornejo-Granados F, Rico K, Canizales-Quinteros S, Soberon X, et al.  
434 Combining metagenomics, metatranscriptomics and viromics to explore novel microbial interactions:  
435 towards a systems-level understanding of human microbiome. *Computational and structural*  
436 *biotechnology journal* 2015;13:390–401.
- 437 [2] Gosalbes MJ, Abellan JJ, Durban A, Perez-Cobas AE, Latorre A, and Moya A. Metagenomics of  
438 human microbiome: beyond 16S rDNA. *Clinical Microbiology and Infection* 2012;18:47–49.
- 439 [3] Maccaferri S, Biagi E, and Brigidi P. Metagenomics: key to human gut microbiota. *Digestive*  
440 *diseases* 2011;29(6):525–530.
- 441 [4] Martin R, Miquel S, Langella P, and Bermudez-Humaran LG. The role of metagenomics in  
442 understanding the human microbiome in health and disease. *Virulence* 2014;5(3):413–423.
- 443 [5] Edmonds-Wilson SL, Nurinova NI, Zapka CA, Fierer N, and Wilson M. Review of human hand  
444 microbiome research. *Journal of dermatological science* 2015;80(1):3–12.
- 445 [6] Blum HE. The human microbiome. *Advances in medical sciences* 2017;62(2):414–420.
- 446 [7] Holmes E, Li JV, Marchesi JR, and Nicholson JK. Gut microbiota composition and activity in  
447 relation to host metabolic phenotype and disease risk. *Cell metabolism* 2012;16(5):559–564.
- 448 [8] Bhatt AP, Redinbo MR, and Bultman SJ. The role of the microbiome in cancer development  
449 and therapy. *CA: a cancer journal for clinicians* 2017;67(4):326–344.
- 450 [9] Cho I and Blaser MJ. The human microbiome: at the interface of health and disease.  
451 *Nature Reviews Genetics* 2012;13(4):260.
- 452 [10] Sonnenburg JL and Backhed F. Diet–microbiota interactions as moderators of human  
453 metabolism. *Nature* 2016;535(7610):56.
- 454 [11] Mullish BH, Marchesi JR, Thursz MR, and Williams HRT. Microbiome manipulation with faecal  
455 microbiome transplantation as a therapeutic strategy in clostridium difficile infection. *QJM: An*  
456 *International Journal of Medicine* 2014;108(5):355–359.

- 457 [12] Moloney RD, Desbonnet L, Clarke G, Dinan TG, and Cryan JF. The microbiome: stress, health  
458 and disease. *Mammalian Genome* 2014;25(1-2):49–74.
- 459 [13] Contreras AV, Cocom-Chan B, Hernandez-Montes G, Portillo-Bobadilla T, and Resendis-  
460 Antonio O. Host-microbiome interaction and cancer: Potential application in precision medicine.  
461 *Frontiers in physiology* 2016;7:606.
- 462 [14] He C, Shan Y, and Song W. Targeting gut microbiota as a possible therapy for diabetes. *Nutrition*  
463 *Research* 2015;35(5):361–367.
- 464 [15] Marx CJ. Can you sequence ecology? metagenomics of adaptive diversification.  
465 *PLoS biology* 2013;11(2):e1001487.
- 466 [16] Hiraoka S, Yang C-C, and Iwasaki W. Metagenomics and bioinformatics in microbial ecology:  
467 current status and beyond. *Microbes and environments* 2016;31(3):204–212.
- 468 [17] Xing M-N, Zhang X-Z, and Huang H. Application of metagenomic techniques in mining  
469 enzymes from microbial communities for biofuel synthesis. *Biotechnology advances*  
470 2012;30(4):920–929.
- 471 [18] Tiwari R, Nain L, Labrou NE, and Shukla P. Bioprospecting of functional cellulases from  
472 metagenome for second generation biofuel production: a review. *Critical reviews in microbiology*  
473 2018;44(2):244–257.
- 474 [19] Sommer MOA, Church GM, and Dantas G. A functional metagenomic approach for expanding  
475 the synthetic biology toolbox for biomass conversion. *Molecular systems biology* 2010;6(1):360.
- 476 [20] Bokulich NA, Lewis ZT, Boundy-Mills K, Mills DA. A new perspective on microbial landscapes  
477 within food production. *Current opinion in biotechnology* 2016;37:182–189.
- 478 [21] Trindade M, van Zyl LJ, Navarro-Fernandez J, and Abd Elrazak A. Targeted metagenomics as a  
479 tool to tap into marine natural product diversity for the discovery and production of drug candidates.  
480 *Frontiers in microbiology* 2015;6:890.

- 481 [22] Zhang MM, Qiao Y, Ang EL, and Zhao H. Using natural products for drug discovery: the impact  
482 of the genomics era. *Expert opinion on drug discovery* 2017;12(5):475–487.
- 483 [23] Techtmann SM and Hazen TC. Metagenomic applications in environmental monitoring and  
484 bioremediation. *Journal of industrial microbiology & biotechnology* 2016;43(10):1345–1354.
- 485 [24] Kunin V, Copeland A, Lapidus A, Mavromatis K, and Hugenholtz P. A bioinformatician’s guide  
486 to metagenomics. *Microbiology and molecular biology reviews* 2008;72(4):557–578.
- 487 [25] Mande SS, Mohammed MH, and Ghosh TS. Classification of metagenomic sequences: methods  
488 and challenges. *Briefings in bioinformatics* 2012;13(6):669–681.
- 489 [26] Ding X, Cheng F, Cao C, and Sun X. Dectico: an alignment-free supervised metagenomic  
490 classification method based on feature extraction and dynamic selection. *BMC Bioinformatics* 2015  
491 16(1):323.
- 492 [27] Cui H and Zhang X. Alignment-free supervised classification of metagenomes by recursive svm.  
493 *BMC Genomics* 2013;14(1):641.
- 494 [28] Liao W, Ren J, Wang K, Wang S, Zeng F, Wang Y, and Sun F. Alignment-free transcriptomic  
495 and metatranscriptomic comparison using sequencing signatures with variable length Markov chains.  
496 *Scientific reports* 2016;6:37243.
- 497 [29] Laczny CC, Kiefer C, Galata V, Fehlmann T, Backes C, and Keller A. Busybee web:  
498 metagenomic data analysis by bootstrapped supervised binning and annotation. *Nucleic acids research*  
499 2017;45(W1):W171–W179.
- 500 [30] Wang Y, Hu H, and Li X. Mbmc: An effective Markov chain approach for binning metagenomic  
501 reads from environmental shotgun sequencing projects. *Omics: a journal of integrative biology*  
502 2016;20(8):470–479.
- 503 [31] Kotamarti RM, Hahsler M, Raiford D, McGee M, and Dunham MaH. Analyzing taxonomic  
504 classification using extensible Markov models. *Bioinformatics* 2010;26(18):2235–2241.

- 505 [32] Seok H-S, Hong W, and Kim J. Estimating the composition of species in metagenomes by  
506 clustering of next generation read sequences. *Methods* 2014;69(3):213–219.
- 507 [33] Lemos LN, Fulthorpe RR, Triplett EW, and Roesch LFW. Rethinking microbial diversity  
508 analysis in the high throughput sequencing era. *Journal of microbiological methods* 2011;86(1):42–  
509 51.
- 510 [34] Janssen P, Goldovsky L, Kunin V, Darzentas N, and Ouzounis CA. Genome coverage, literally  
511 speaking: The challenge of annotating 200 genomes with 4 million publications. *EMBO reports* 2005;  
512 6(5):397–399.
- 513 [35] Akondi KB and Lakshmi VV. Emerging trends in genomic approaches for microbial  
514 bioprospecting. *Omics: a journal of integrative biology* 2013;17(2):61–70.
- 515 [36] Hunter-Cevera JC. The value of microbial diversity. *Current Opinion in Microbiology*  
516 1998;1(3):278–285.
- 517 [37] Pace NR. Mapping the tree of life: progress and prospects. *Microbiology and molecular biology*  
518 *reviews* 2009;73(4):565–576.
- 519 [38] Grattepanche J-D, Santoferrara LF, McManus GB, and Katz LA. Diversity of diversity:  
520 conceptual and methodological differences in biodiversity estimates of eukaryotic microbes as  
521 compared to bacteria. *Trends in microbiology* 2014;22(8):432–437.
- 522 [39] Zinger L, Gobet A, and Pommier T. Two decades of describing the unseen majority of aquatic  
523 microbial diversity. *Molecular Ecology* 2012;21(8):1878–1896.
- 524 [40] Szalkai B, Scheer I, Nagy K, Vertessy BG, Grolmusz V. The metagenomic telescope. *PloS One*  
525 2014;9(7):e101605.
- 526 [41] Rosen GL, Polikar R, Caseiro DA, Essinger SD, and Sokhansanj BA. Discovering the unknown:  
527 improving detection of novel species and genera from short reads. *BioMed Research International*  
528 2011;2011:495849. doi: 10.1155/2011/495849.

- 529 [42] Kislyuk A, Bhatnagar S, Dushoff J, and Weitz JS. Unsupervised statistical clustering of  
530 environmental shotgun sequences. *BMC Bioinformatics* 2009;10(1):316.
- 531 [43] Roumpeka DD, Wallace RJ, Escalettes F, Fotheringham I, and Watson M. A review of  
532 bioinformatics tools for bio-prospecting from metagenomic sequence data. *Frontiers in genetics*  
533 2017;8:23.
- 534 [44] Wu Y-W and Ye Y. A novel abundance-based algorithm for binning metagenomic sequences  
535 using l-tuples. *Journal of Computational Biology* 2011;18(3):523–534.
- 536 [45] Wang Y, Leung HCM, Yiu S-M, and Chin FYL. Metacluster 4.0: a novel binning algorithm for  
537 NGS reads and huge number of species. *Journal of Computational Biology* 2012;19(2):241–249.
- 538 [46] Van Lang T, Van Hoai T, et al. A two-phase binning algorithm using l-mer frequency on groups  
539 of non-overlapping reads. *Algorithms for Molecular Biology* 2015;10(1):2.
- 540 [47] Song K, Ren J, Reinert G, Deng M, Waterman MS, and Sun F. New developments of alignment-  
541 free sequence comparison: measures, statistics and next-generation sequencing. *Briefings in*  
542 *bioinformatics* 2013;15(3):343–353.
- 543 [48] Giroto S, Pizzi C, and Comin M. Metaprob: accurate metagenomic reads binning based on  
544 probabilistic sequence signatures. *Bioinformatics* 2016;32(17):i567–i575.
- 545 [49] Anvar SY, Khachatryan L, Vermaat M, van Galen M, Pulyakhina I, Ariyurek Y, Kraaijeveld K,  
546 den Dunnen JT, de Knijff P, Ac't Hoen P, et al. Determining the quality and complexity of next-  
547 generation sequencing data without a reference genome. *Genome Biology* 2014;15(12):555.
- 548 [50] Ono Y, Asai K, and Hamada M. Pbsim: PacBio reads simulator—toward accurate  
549 genome assembly. *Bioinformatics* 2012;29(1):119–121.
- 550 [51] van Eijk E, Anvar SY, Browne HP, Leung WY, Frank J, Schmitz AM, Roberts AP, and Smits  
551 WK. Complete genome sequence of the *Clostridium difficile* laboratory strain 630d erm reveals  
552 differences from strain 630, including translocation of the mobile element ctn 5. *BMC Genomics*  
553 2015;16(1):31.

554 [52] Haroon MF, Hu S, Shi Y, Imelfort M, Keller J, Hugenholtz P, Yuan Z, and Tyson GW. Anaerobic  
555 oxidation of methane coupled to nitrate reduction in a novel archaeal lineage. *Nature*  
556 2013;500(7464):567.

557 [53] Chaisson MJ and Tesler G. Mapping single molecule sequencing reads using basic local  
558 alignment with successive refinement (blasr): application and theory. *BMC Bioinformatics*  
559 2012;13(1):238.

560 [54] Altschul SF, Gish W, Miller W, Myers EW, and Lipman DJ. Basic local alignment search tool.  
561 *Journal of molecular biology* 1990;215(3):403–410.

562 [55] Chin C-S, Peluso P, Sedlazeck FJ, Nattestad M, Concepcion GT, Clum A, Dunn C, O'Malley,  
563 Figueroa-Balderas RR, Morales-Cruz A, et al. Phased diploid genome assembly with single-molecule  
564 real-time sequencing. *Nature methods* 2016;13(12):1050.

565 [56] Hamada M, Ono Y, Asai K, and Frith MC. Training alignment parameters for arbitrary  
566 sequencers with last-train. *Bioinformatics* 2016;33(6):926–928.

567 [57] van der Maaten L and Hinton G. Visualizing data using t-sne. *Journal of machine learning*  
568 *research* 2008;9(Nov):2579–2605.

569 [58] Ester M, Kriegel H-P, Sander J, Xu X, et al. A density-based algorithm for discovering clusters  
570 in large spatial databases with noise. In *Kdd1996* ;96 :226–231.

571 [59] Frank J, Lucker S, Vossen RHAM, Jetten MSM, Hall RJ, Op den Camp HJM, and Anvar SY.  
572 Resolving the complete genome of *Kuenenia stuttgartiensis* from a membrane bioreactor enrichment  
573 using single-molecule real-time sequencing. *Scientific reports* 2018;8(1):4580.

574

575 ADDITIONAL FILES

576 Additional file 1: Article supplement (PDF 143 kb).

577 Section S1: Threshold for the contig-genome similarity using LAST; Section S2: Detailed results of  
578 artificial metagenomes binning.
